# Supplementary material for: Characterization of the Angiogenic Potential of Human Regulatory Macrophages (Mreg) after Ischemia/Reperfusion Injury In Vitro
Source: Hindawi journal article supplement (doi:10.1155/2019/3725863), 2019-06-25

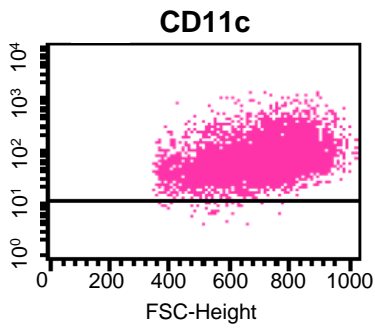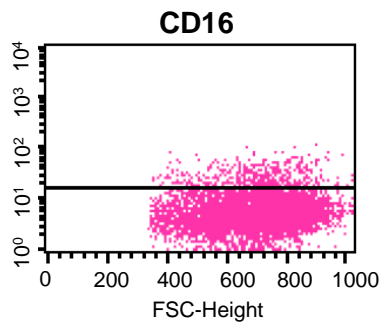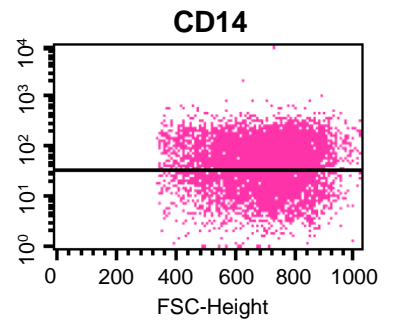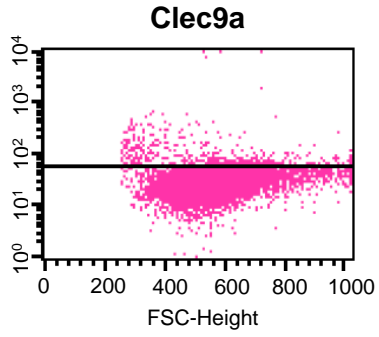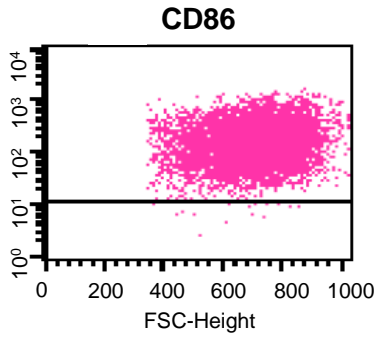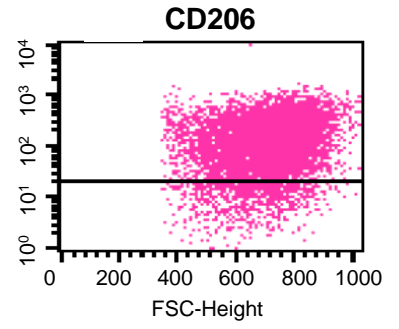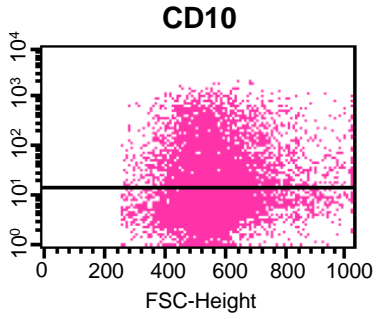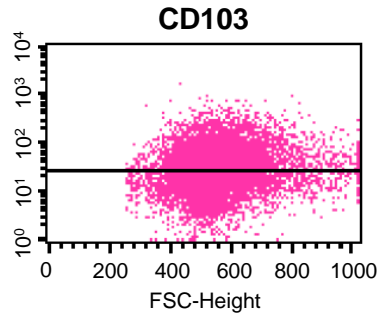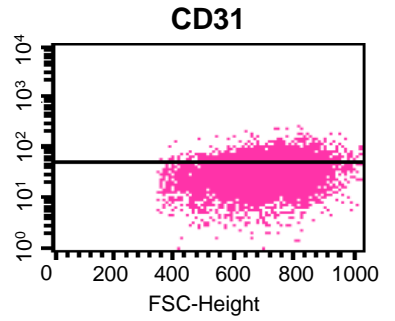

Supplement: f1 [file 3725863.f1.pdf]
