# Supplementary material for: Characterization of the Angiogenic Potential of Human Regulatory Macrophages (Mreg) after Ischemia/Reperfusion Injury In Vitro
Source: Hindawi journal article supplement (doi:10.1155/2019/3725863), 2019-06-25
Supplement: f2 [file 3725863.f2.pdf]

| <b>Coordinate</b>  | <b>Abbreviation</b> | <b>Name (alternative nomenclature)</b>                                   |
|--------------------|---------------------|--------------------------------------------------------------------------|
| <b>A1; A12; F1</b> | Ref. spot           | Reference spot                                                           |
| <b>A3</b>          | AktivinA            | AktivinA                                                                 |
| <b>A4</b>          | ADAMTS1             | Angiogenin                                                               |
| <b>A5</b>          | Angiogenin          | Angiogenin                                                               |
| <b>A6</b>          | Angiop. 1           | Angiopoetin 1                                                            |
| <b>A7</b>          | Angiop. 2           | Angiopoetin 2                                                            |
| <b>A8</b>          | Angiostatin         | Angiostatin                                                              |
| <b>A9</b>          | Amphireg.           | Amphiregulin                                                             |
| <b>A10</b>         | Artemin             | Artemin                                                                  |
| <b>B1</b>          | TF                  | Tissue factor (Coagulation Factor III)                                   |
| <b>B2</b>          | CXCL-16             | C-X-C motif chemokine ligand 16                                          |
| <b>B3</b>          | DPPIV               | Dipeptidyl-peptidase IV                                                  |
| <b>B4</b>          | EGF                 | Epidermal growth factor                                                  |
| <b>B5</b>          | EG-VEGF             | Endocrine gland derived vascular endothelial growth factor               |
| <b>B6</b>          | Endoglin            | Endoglin (Cluster of differentiation 105; CD105)                         |
| <b>B7</b>          | Endostatin          | Endostatin                                                               |
| <b>B8</b>          | ET-1                | Endothelin-1                                                             |
| <b>B9</b>          | FGF acidic          | Fibroblast growth factor acidic                                          |
| <b>B10</b>         | FGF basic           | Fibroblast growth factor basic (FGF-2)                                   |
| <b>B11</b>         | FGF-4               | Fibroblast growth factor-4                                               |
| <b>B12</b>         | FGF-7               | Fibroblast growth factor-7                                               |
| <b>C1</b>          | GDNF                | Glial cell-derived neurotrophic factor                                   |
| <b>C2</b>          | GM-CSF              | Granulocyte-macrophage-colony stimulating factor                         |
| <b>C3</b>          | HB-EGF              | Heparin-binding epidermal growth factor                                  |
| <b>C4</b>          | HGF                 | Hepatocyte growth factor (Scatter factor)                                |
| <b>C5</b>          | IGFBP-1             | Insulin-like growth factor-binding protein 1                             |
| <b>C6</b>          | IGFBP-2             | Insulin-like growth factor-binding protein 2                             |
| <b>C7</b>          | IGFBP-3             | Insulin-like growth factor-binding protein 3                             |
| <b>C8</b>          | IL-1 $\beta$        | Interleukin-1 $\beta$                                                    |
| <b>C9</b>          | IL-8                | Interleukin-8 (C-X-C motif chemokine ligand 8; CXCL8)                    |
| <b>C10</b>         | TGF- $\beta$ 1      | Transforming growth factor- $\beta$ 1                                    |
| <b>C11</b>         | Leptin              | Leptin                                                                   |
| <b>C12</b>         | MCP-1               | Monocyte chemoattractant protein 1(CC-chemokine ligand 2; CCL2)          |
| <b>D1</b>          | MIP-1 $\alpha$      | Macrophage inflammatory protein-1 $\alpha$ (CC-chemokine ligand 3; CCL3) |
| <b>D2</b>          | MMP-8               | Matrix metalloproteinase-8                                               |
| <b>D3</b>          | MMP-9               | Matrix metalloproteinase-9                                               |
| <b>D4</b>          | NRG1- $\beta$ 1     | Neuregulin1- $\beta$ 1                                                   |
| <b>D5</b>          | Pentraxin3          | Pentraxin3                                                               |
| <b>D6</b>          | PD-ECGF             | Platelet-derived endothelial cell growth factor                          |
| <b>D7</b>          | PDGF-AA             | Platelet-derived growth factor AA                                        |
| <b>D8</b>          | PDGF-AB             | Platelet-derived growth factor AB                                        |
| <b>D9</b>          | Persephin           | Persephin                                                                |
| <b>D10</b>         | CXCL4               | C-X-C motif chemokine ligand 4                                           |
| <b>D11</b>         | PGF                 | Placental growth factor                                                  |
| <b>D12</b>         | Prolactin           | Prolactin                                                                |
| <b>E1</b>          | Serpin B1           | Serpin B1 (Leukocyte elastase inhibitor; LEI)                            |
| <b>E2</b>          | Serpin E1           | Serpin E1 (Plasminogen activator inhibitor-1 ; PAI-1)                    |
| <b>E3</b>          | Serpin F1           | Serpin F1 (Pigment epithelium-derived factor; PEDF)                      |
| <b>E4</b>          | TIMP-1              | Tissue inhibitor of metalloproteinases-1                                 |
| <b>E5</b>          | TIMP-4              | Tissue inhibitor of metalloproteinases-4                                 |
| <b>E6</b>          | TSP-1               | Thrombospondin-1                                                         |
| <b>E7</b>          | TSP-2               | Thrombospondin-2                                                         |
| <b>E8</b>          | uPA                 | Urokinase-type plasminogen activator                                     |
| <b>E9</b>          | Vasohibin           | Vasohibin                                                                |
| <b>E10</b>         | VEGF                | Vascular endothelial growth factor                                       |
| <b>E11</b>         | VEGF-C              | Vascular endothelial growth factor-C                                     |
| <b>F12</b>         | Neg. ctr.           | Negative controls                                                        |
